# Supplementary material for: Vertebrates on the brink as indicators of biological annihilation and the sixth mass extinction
Source: PubMed Central journal article supplement (PMC7306750; doi:10.1073/pnas.1922686117), 2020-06-01
Supplement: pnas.1922686117.sapp.pdf [file pnas.1922686117.sapp.pdf]

**VERTEBRATE SPECIES WITH LESS THAN 1000 INDIVIDUALS (IUCN, 2019)**

| <b>SCIENTIFIC NAME</b>            | <b>COMMON NAME</b>           | <b>Category</b> |
|-----------------------------------|------------------------------|-----------------|
| <b>MAMMALS</b>                    |                              |                 |
| <i>Addax nasomaculatus</i>        | Addax                        | CR              |
| <i>Ailuropoda melanoleuca</i>     | Giant Panda                  | VU              |
| <i>Aproteles bulmerae</i>         | Bulmer's Fruit Bat           | CR              |
| <i>Axis kuhlii</i>                | Bawean Deer                  | CR              |
| <i>Babyrousa togeanensis</i>      | Togian Islands Babirusa      | EN              |
| <i>Beatragus hunteri</i>          | Hirola                       | CR              |
| <i>Bos sauveli</i>                | Kouprey                      | CR              |
| <i>Brachyteles hypoxanthus</i>    | Northern Muriqui             | CR              |
| <i>Bubalus mindorensis</i>        | Tamaraw                      | CR              |
| <i>Bunolagus monticularis</i>     | Riverine Rabbit              | CR              |
| <i>Caenolestes condorensis</i>    | Andean Caenolestid           | VU              |
| <i>Callicebus barbarabrownae</i>  | Blond Titi Monkey            | CR              |
| <i>Camelus ferus</i>              | Bactrian Camel               | CR              |
| <i>Canis rufus</i>                | Red Wolf                     | CR              |
| <i>Canis simensis</i>             | Ethiopian Wolf               | EN              |
| <i>Capra walie</i>                | Walia Ibex                   | EN              |
| <i>Cavia intermedia</i>           | Santa Catarina's Guinea Pig  | CR              |
| <i>Cercopithecus dryas</i>        | Dryad Monkey                 | CR              |
| <i>Coleura seychellensis</i>      | Seychelles Sheath-tailed Bat | CR              |
| <i>Crocidura trichura</i>         | Christmas Island Shrew       | CR              |
| <i>Dendrolagus mayri</i>          | Wondiwoi Tree-kangaroo       | CR              |
| <i>Dendrolagus pulcherrimus</i>   | Golden-mantled Tree Kangaroo | CR              |
| <i>Dendrolagus scottae</i>        | Tenkile                      | CR              |
| <i>Dicerorhinus sumatrensis</i>   | Sumatran Rhinoceros          | CR              |
| <i>Dipodomys gravipes</i>         | San Quintin Kangaroo Rat     | CR              |
| <i>Equus africanus</i>            | African Wild Ass             | CR              |
| <i>Equus ferus</i>                | Przewalski's Horse           | EN              |
| <i>Gazella leptoceros</i>         | Slender-horned Gazelle       | EN              |
| <i>Habromys simulatus</i>         | Jico Deer Mouse              | CR              |
| <i>Hipposideros hypophyllus</i>   | Kolar Leaf-nosed Bat         | CR              |
| <i>Lasiorhinus krefftii</i>       | Northern Hairy-nosed Wombat  | CR              |
| <i>Leontopithecus chrysopygus</i> | Black Lion Tamarin           | EN              |
| <i>Leontopithecus rosalia</i>     | Golden Lion Tamarin          | EN              |
| <i>Lepilemur septentrionalis</i>  | Sahafary Sportive Lemur      | CR              |
| <i>Lonchophylla dekeyseri</i>     | Dekeyser's Nectar Bat        | EN              |
| <i>Lonchorhina fernandezi</i>     | Fernandez's Sword-nosed Bat  | EN              |
| <i>Lynx pardinus</i>              | Iberian Lynx                 | EN              |
| <i>Marmota vancouverensis</i>     | Vancouver Island Marmot      | CR              |
| <i>Martes gwatkinsii</i>          | Nilgiri Marten               | VU              |
| <i>Mesocapromys nanus</i>         | Dwarf Hutia                  | CR              |

|                                     |                           |    |
|-------------------------------------|---------------------------|----|
| <i>Mesocapromys sanfelipensis</i>   | Little Earth Hutia        | CR |
| <i>Mirimiri acrodonta</i>           | Fijian Monkey-faced Bat   | CR |
| <i>Mustela nigripes</i>             | Black-footed Ferret       | EN |
| <i>Myotis planiceps</i>             | Flat-headed Myotis        | EN |
| <i>Myrmecobius fasciatus</i>        | Numbat                    | EN |
| <i>Nanger dama</i>                  | Dama Gazelle              | CR |
| <i>Nomascus hainanus</i>            | Hainan Gibbon             | CR |
| <i>Nomascus nasutus</i>             | Cao-vit Crested Gibbon    | CR |
| <i>Oryx leucoryx</i>                | Arabian Oryx              | VU |
| <i>Parantechinus apicalis</i>       | Dibbler                   | EN |
| <i>Peromyscus mekisturus</i>        | Puebla Deer Mouse         | CR |
| <i>Petrogale sharmani</i>           | Mount Claro Rock Wallaby  | VU |
| <i>Phalanger matanim</i>            | Telefomin Cuscus          | CR |
| <i>Phyllonycteris aphylla</i>       | Jamaican Flower Bat       | CR |
| <i>Pipistrellus maderensis</i>      | Madeira Pipistrelle       | VU |
| <i>Porcula salvania</i>             | Pygmy Hog                 | CR |
| <i>Potorous gilbertii</i>           | Gilbert's Potoroo         | CR |
| <i>Procyon pygmaeus</i>             | Pygmy Raccoon             | CR |
| <i>Propithecus perrieri</i>         | Perrier's Sifaka          | CR |
| <i>Pseudoryx nghetinhensis</i>      | Saola                     | CR |
| <i>Pteralopex pulchra</i>           | Montane Monkey-faced Bat  | CR |
| <i>Pteropus pselaphon</i>           | Bonin Flying Fox          | EN |
| <i>Reithrodontomys spectabilis</i>  | Cozumel Harvest Mouse     | CR |
| <i>Rhinoceros sondaicus</i>         | Javan Rhinoceros          | CR |
| <i>Rhinolophus cohenae</i>          | Cohen's Horseshoe Bat     | VU |
| <i>Rhinopithecus strykeri</i>       | Myanmar Snub-nosed Monkey | CR |
| <i>Rhinopoma hadramauticum</i>      | Yemeni Mouse-tailed Bat   | EN |
| <i>Rusa alfredi</i>                 | Philippine Spotted Deer   | EN |
| <i>Trachypithecus poliocephalus</i> | White-headed Langur       | CR |
| <i>Uromys imperator</i>             | Emperor Rat               | CR |
| <i>Uromys porculus</i>              | Guadalcanal Rat           | CR |
| <i>Viverra civettina</i>            | Malabar Civet             | CR |
| <i>Zyzomys palatalis</i>            | Carpentarian Rock-rat     | CR |
| <i>Zyzomys pedunculatus</i>         | Central Rock-rat          | CR |

## BIRDS

|                                  |                     |    |
|----------------------------------|---------------------|----|
| <i>Accipiter gundlachi</i>       | Gundlach's Hawk     | EN |
| <i>Accipiter imitator</i>        | Imitator Goshawk    | VU |
| <i>Acridotheres melanopterus</i> | Black-winged Myna   | CR |
| <i>Acridotheres tertius</i>      | Grey-rumped Myna    | CR |
| <i>Acridotheres tricolor</i>     | Grey-backed Myna    | CR |
| <i>Acrocephalus caffer</i>       | Tahiti Reed-warbler | EN |
| <i>Acrocephalus familiaris</i>   | Millerbird          | CR |

|                                  |                                    |    |
|----------------------------------|------------------------------------|----|
| <i>Acrocephalus sorghophilus</i> | Streaked Reed-warbler              | EN |
| <i>Acrocephalus vaughani</i>     | Pitcairn Reed-warbler              | EN |
| <i>Actenoides bougainvillei</i>  | Bougainville Moustached Kingfisher | EN |
| <i>Aepypodius bruijnii</i>       | Waigeo Brush-turkey                | EN |
| <i>Aerodramus sawtelli</i>       | Atiu Swiftlet                      | VU |
| <i>Agelaius xanthomus</i>        | Yellow-shouldered Blackbird        | EN |
| <i>Alauda razae</i>              | Raso Lark                          | CR |
| <i>Alcedo euryzona</i>           | Javan Blue-banded Kingfisher       | CR |
| <i>Alopecoenas canifrons</i>     | Palau Ground-dove                  | EN |
| <i>Alopecoenas erythropterus</i> | Polynesian Ground-dove             | CR |
| <i>Alopecoenas kubaryi</i>       | Caroline Ground-dove               | VU |
| <i>Alopecoenas rubescens</i>     | Marquesas Ground-dove              | EN |
| <i>Amaurocichla bocagii</i>      | Sao Tome Short-tail                | VU |
| <i>Amazilia luciae</i>           | Honduran Emerald                   | EN |
| <i>Amazona arausiaca</i>         | Red-necked Amazon                  | VU |
| <i>Amazona guildingii</i>        | St Vincent Amazon                  | VU |
| <i>Amazona imperialis</i>        | Imperial Amazon                    | EN |
| <i>Amazona versicolor</i>        | St Lucia Amazon                    | VU |
| <i>Anairetes alpinus</i>         | Ash-breasted Tit-tyrant            | EN |
| <i>Anas albogularis</i>          | Andaman Teal                       | VU |
| <i>Anas laysanensis</i>          | Laysan Duck                        | CR |
| <i>Anas nesiotis</i>             | Campbell Teal                      | EN |
| <i>Anodorhynchus leari</i>       | Lear's Macaw                       | EN |
| <i>Anthochaera phrygia</i>       | Regent Honeyeater                  | CR |
| <i>Antilophia bokermanni</i>     | Araripe Manakin                    | CR |
| <i>Apalis fuscigularis</i>       | Taita Apalis                       | CR |
| <i>Aphrastura masafucae</i>      | Masafuera Rayadito                 | CR |
| <i>Aplonis santovestris</i>      | Santo Starling                     | EN |
| <i>Apteryx rowi</i>              | Okarito Kiwi                       | VU |
| <i>Apus acuticauda</i>           | Dark-rumped Swift                  | VU |
| <i>Aquila adalberti</i>          | Spanish Imperial Eagle             | VU |
| <i>Ara glaucogularis</i>         | Blue-throated Macaw                | CR |
| <i>Ara rubrogenys</i>            | Red-fronted Macaw                  | CR |
| <i>Ardea humbloti</i>            | Madagascar Heron                   | EN |
| <i>Ardea insignis</i>            | White-bellied Heron                | CR |
| <i>Ardeotis nigriceps</i>        | Great Indian Bustard               | CR |
| <i>Artisornis moreaui</i>        | Long-billed Tailorbird             | CR |
| <i>Artisornis sousae</i>         | Mozambique Forest-warbler          | EN |
| <i>Asarcornis scutulata</i>      | White-winged Duck                  | EN |
| <i>Asthenes perijana</i>         | Perija Thistletail                 | EN |

|                                      |                              |    |
|--------------------------------------|------------------------------|----|
| <i>Atlapetes flaviceps</i>           | Yellow-headed Brush-finch    | EN |
| <i>Atlapetes pallidiceps</i>         | Pale-headed Brush-finch      | EN |
| <i>Aythya baeri</i>                  | Baer's Pochard               | CR |
| <i>Aythya innotata</i>               | Madagascar Pochard           | CR |
| <i>Bostrychia bocagei</i>            | Dwarf Ibis                   | CR |
| <i>Branta sandvicensis</i>           | Hawaiian Goose               | VU |
| <i>Buteo galapagoensis</i>           | Galapagos Hawk               | VU |
| <i>Buteo ridgwayi</i>                | Ridgway's Hawk               | CR |
| <i>Buteo socotraensis</i>            | Socotra Buzzard              | VU |
| <i>Buteo ventralis</i>               | Rufous-tailed Hawk           | VU |
| <i>Buteogallus coronatus</i>         | Crowned Solitary Eagle       | EN |
| <i>Cacatua haematuropygia</i>        | Philippine Cockatoo          | CR |
| <i>Calicalicus rufocarpalis</i>      | Red-shouldered Vanga         | VU |
| <i>Calidris pygmaea</i>              | Spoon-billed Sandpiper       | CR |
| <i>Capito wallacei</i>               | Scarlet-banded Barbet        | VU |
| <i>Carpococcyx viridis</i>           | Sumatran Ground-cuckoo       | CR |
| <i>Carpodectes antoniae</i>          | Yellow-billed Cotinga        | EN |
| <i>Centropus steerii</i>             | Black-hooded Coucal          | CR |
| <i>Certhia tianquanensis</i>         | Sichuan Treecreeper          | NT |
| <i>Ceyx sangirensis</i>              | Sangihe Dwarf-kingfisher     | CR |
| <i>Chaetocercus berlepschi</i>       | Esmeraldas Woodstar          | EN |
| <i>Charadrius obscurus</i>           | Southern Red-breasted Plover | CR |
| <i>Charadrius sanctaehelenae</i>     | St Helena Plover             | VU |
| <i>Charmosyna toxopei</i>            | Blue-fronted Lorikeet        | CR |
| <i>Chlorophoneus kupeensis</i>       | Mount Kupe Bush-shrike       | EN |
| <i>Chondrohierax wilsonii</i>        | Cuban Kite                   | CR |
| <i>Chrysocolaptes xanthocephalus</i> | Yellow-faced Flameback       | EN |
| <i>Ciconia stormi</i>                | Storm's Stork                | EN |
| <i>Cinclodes aricomae</i>            | Royal Cinclodes              | CR |
| <i>Cinclodes palliatus</i>           | White-bellied Cinclodes      | CR |
| <i>Cinnyris rockefelleri</i>         | Rockefeller's Sunbird        | VU |
| <i>Circus macrosceles</i>            | Madagascar Marsh-harrier     | EN |
| <i>Circus maillardi</i>              | Reunion Marsh-harrier        | EN |
| <i>Circus maurus</i>                 | Black Harrier                | EN |
| <i>Cissa thalassina</i>              | Javan Green Magpie           | CR |
| <i>Claravis geoffroyi</i>            | Purple-winged Ground-dove    | CR |
| <i>Clytoctantes alixii</i>           | Recurve-billed Bushbird      | EN |
| <i>Clytorhynchus sanctaecrucis</i>   | Nendo Shrikebill             | EN |
| <i>Coccyzus ferrugineus</i>          | Cocos Cuckoo                 | VU |
| <i>Coeligena orina</i>               | Glittering Starfrontlet      | CR |

|                                     |                           |    |
|-------------------------------------|---------------------------|----|
| <i>Colaptes fernandinae</i>         | Fernandina's Flicker      | VU |
| <i>Columba thomensis</i>            | Sao Tome Olive-pigeon     | EN |
| <i>Columbina cyanopis</i>           | Blue-eyed Ground-dove     | CR |
| <i>Conothraupis mesoleuca</i>       | Cone-billed Tanager       | EN |
| <i>Copsychus sechellarum</i>        | Seychelles Magpie-robin   | EN |
| <i>Coracopsis barklyi</i>           | Seychelles Parrot         | VU |
| <i>Coracornis sanghirensis</i>      | Sangihe Whistler          | CR |
| <i>Corvus kubaryi</i>               | Mariana Crow              | CR |
| <i>Corvus unicolor</i>              | Banggai Crow              | CR |
| <i>Cotinga maculata</i>             | Banded Cotinga            | EN |
| <i>Crax blumenbachii</i>            | Red-billed Curassow       | EN |
| <i>Crax globulosa</i>               | Wattled Curassow          | EN |
| <i>Crithagra concolor</i>           | Sao Tome Grosbeak         | CR |
| <i>Crithagra flavigula</i>          | Yellow-throated Seedeater | EN |
| <i>Cyanolimnas cerverai</i>         | Zapata Rail               | CR |
| <i>Cyanoramphus forbesi</i>         | Chatham Parakeet          | VU |
| <i>Cyanoramphus malherbi</i>        | Malherbe's Parakeet       | CR |
| <i>Cyclopsitta coxeni</i>           | Coxen's Fig-parrot        | EN |
| <i>Dasyornis longirostris</i>       | Western Bristlebird       | EN |
| <i>Dendrocitta bayleii</i>          | Andaman Treepie           | VU |
| <i>Dendrocopos noguchii</i>         | Okinawa Woodpecker        | CR |
| <i>Dicaeum quadricolor</i>          | Cebu Flowerpecker         | CR |
| <i>Dicrurus aldabranus</i>          | Aldabra Drongo            | NT |
| <i>Dicrurus fuscipennis</i>         | Grand Comoro Drongo       | EN |
| <i>Dicrurus menagei</i>             | Tablas Drongo             | EN |
| <i>Didunculus strigirostris</i>     | Tooth-billed Pigeon       | CR |
| <i>Diomedea amsterdamensis</i>      | Amsterdam Albatross       | EN |
| <i>Dreptes thomensis</i>            | Giant Sunbird             | VU |
| <i>Ducula galeata</i>               | Nukuhiva Imperial-pigeon  | EN |
| <i>Edolisoma nesiotis</i>           | Yap Cicadabird            | EN |
| <i>Elaenia ridleyana</i>            | Noronha Elaenia           | VU |
| <i>Eleoscytalopus psychopompus</i>  | Bahia Tapaculo            | EN |
| <i>Emberiza jankowskii</i>          | Rufous-backed Bunting     | EN |
| <i>Eriocnemis isabellae</i>         | Gorgeted Puffleg          | CR |
| <i>Eriocnemis mirabilis</i>         | Colorful Puffleg          | EN |
| <i>Eriocnemis nigrivestis</i>       | Black-breasted Puffleg    | CR |
| <i>Erythropitta caeruleitorques</i> | Sangihe Pitta             | EN |
| <i>Erythropitta palliceps</i>       | Siau Pitta                | EN |
| <i>Erythropitta splendida</i>       | Tabar Pitta               | VU |
| <i>Eulidia yarrellii</i>            | Chilean Woodstar          | CR |

|                                   |                               |    |
|-----------------------------------|-------------------------------|----|
| <i>Eutrichomyias rowleyi</i>      | Cerulean Paradise-flycatcher  | CR |
| <i>Eutriorchis astur</i>          | Madagascar Serpent-eagle      | EN |
| <i>Falco araeus</i>               | Seychelles Kestrel            | VU |
| <i>Falco fasciinucha</i>          | Taita Falcon                  | VU |
| <i>Falco hypoleucos</i>           | Grey Falcon                   | VU |
| <i>Falco punctatus</i>            | Mauritius Kestrel             | EN |
| <i>Formicivora paludicola</i>     | Marsh Antwren                 | CR |
| <i>Forpus xanthops</i>            | Yellow-faced Parrotlet        | VU |
| <i>Foudia rubra</i>               | Mauritius Fody                | EN |
| <i>Fringilla polatzeki</i>        | Gran Canaria Blue Chaffinch   | EN |
| <i>Gallicolumba keayi</i>         | Negros Bleeding-heart         | CR |
| <i>Gallicolumba platenae</i>      | Mindoro Bleeding-heart        | CR |
| <i>Garrulax courtoisi</i>         | Blue-crowned Laughingthrush   | CR |
| <i>Garrulax rufifrons</i>         | Rufous-fronted Laughingthrush | CR |
| <i>Geospiza acutirostris</i>      | Genovesa Ground-finch         | VU |
| <i>Geospiza conirostris</i>       | Espanola Cactus-finch         | VU |
| <i>Geospiza heliobates</i>        | Mangrove Finch                | CR |
| <i>Geospiza propinqua</i>         | Genovesa Cactus-finch         | VU |
| <i>Geospiza septentrionalis</i>   | Vampire Ground-finch          | VU |
| <i>Geronticus eremita</i>         | Northern Bald Ibis            | EN |
| <i>Glaucis dohrnii</i>            | Hook-billed Hermit            | EN |
| <i>Gorsachius magnificus</i>      | White-eared Night-heron       | EN |
| <i>Gracula robusta</i>            | Nias Hill Myna                | CR |
| <i>Grallaria fenwickorum</i>      | Antioquia Antpitta            | CR |
| <i>Grallaria kaestneri</i>        | Cundinamarca Antpitta         | EN |
| <i>Grallaria ridgelyi</i>         | Jocotoco Antpitta             | EN |
| <i>Grallaricula ochraceifrons</i> | Ochre-fronted Antpitta        | EN |
| <i>Grus americana</i>             | Whooping Crane                | EN |
| <i>Gymnogyps californianus</i>    | California Condor             | CR |
| <i>Gymnomyza aubryana</i>         | Crow Honeyeater               | CR |
| <i>Gymnomyza samoensis</i>        | Mao                           | EN |
| <i>Haematopus chathamensis</i>    | Chatham Oystercatcher         | EN |
| <i>Haliaeetus sanfordi</i>        | Sanford's Sea-eagle           | VU |
| <i>Haliaeetus vociferoides</i>    | Madagascar Fish-eagle         | CR |
| <i>Hapalopsittaca fuertesi</i>    | Indigo-winged Parrot          | CR |
| <i>Hemignathus wilsoni</i>        | Akiapolaau                    | EN |
| <i>Hemiphaga chathamensis</i>     | Chatham Pigeon                | VU |
| <i>Herpsilochmus parkeri</i>      | Ash-throated Antwren          | EN |
| <i>Heteroglaux blewitti</i>       | Forest Owlet                  | EN |
| <i>Heteromirafra archeri</i>      | Liben Lark                    | CR |

|                                 |                              |    |
|---------------------------------|------------------------------|----|
| <i>Houbaropsis bengalensis</i>  | Bengal Florican              | CR |
| <i>Hydrobates monteiroi</i>     | Monteiro's Storm-petrel      | VU |
| <i>Hypotaenidia okinawae</i>    | Okinawa Rail                 | EN |
| <i>Hypotaenidia sylvestris</i>  | Lord Howe Woodhen            | EN |
| <i>Hypsipetes olivaceus</i>     | Mauritius Black Bulbul       | VU |
| <i>Icterus northropi</i>        | Bahama Oriole                | CR |
| <i>Icterus oberi</i>            | Montserrat Oriole            | VU |
| <i>Jacamaralcyon tridactyla</i> | Three-toed Jacamar           | VU |
| <i>Junco insularis</i>          | Guadalupe Junco              | EN |
| <i>Lalage newtoni</i>           | Reunion Cuckooshrike         | CR |
| <i>Lalage typica</i>            | Mauritius Cuckooshrike       | VU |
| <i>Laniarius amboimensis</i>    | Gabela Bush-shrike           | EN |
| <i>Laniarius brauni</i>         | Orange-breasted Bush-shrike  | EN |
| <i>Lanius newtoni</i>           | Sao Tome Fiscal              | CR |
| <i>Larus fuliginosus</i>        | Lava Gull                    | VU |
| <i>Lepidopygia lilliae</i>      | Sapphire-bellied Hummingbird | CR |
| <i>Leptasthenura xenothorax</i> | White-browed Tit-spinetail   | EN |
| <i>Leptodon forbesi</i>         | White-collared Kite          | EN |
| <i>Leptotila wellsi</i>         | Grenada Dove                 | CR |
| <i>Leucocarbo carunculatus</i>  | Rough-faced Shag             | VU |
| <i>Leucocarbo onslowi</i>       | Chatham Shag                 | CR |
| <i>Leucocarbo ranfurlyi</i>     | Bounty Shag                  | VU |
| <i>Linaria johannis</i>         | Warsangli Linnet             | EN |
| <i>Liocichla bugunorum</i>      | Bugun Liocichla              | CR |
| <i>Lipaugus weberi</i>          | Chestnut-capped Piha         | CR |
| <i>Loddigesia mirabilis</i>     | Marvelous Spatuletail        | EN |
| <i>Lophornis brachylophus</i>   | Short-crested Coquette       | CR |
| <i>Lophura edwardsi</i>         | Edwards's Pheasant           | CR |
| <i>Loxops caeruleirostris</i>   | Akekee                       | CR |
| <i>Manorina melanotis</i>       | Black-eared Miner            | EN |
| <i>Megalurulus grosvenori</i>   | Bismarck Thicketbird         | VU |
| <i>Megalurulus rufus</i>        | Long-legged Thicketbird      | EN |
| <i>Megapodius pritchardii</i>   | Tongan Scrubfowl             | EN |
| <i>Melanospiza richardsoni</i>  | St Lucia Black Finch         | EN |
| <i>Mergus octosetaceus</i>      | Brazilian Merganser          | CR |
| <i>Mimus graysoni</i>           | Socorro Mockingbird          | CR |
| <i>Mimus trifasciatus</i>       | Floreana Mockingbird         | EN |
| <i>Myadestes palmeri</i>        | Puaiohi                      | CR |
| <i>Nemosia rourei</i>           | Cherry-throated Tanager      | CR |
| <i>Neophema chrysogaster</i>    | Orange-bellied Parrot        | CR |

|                                   |                             |    |
|-----------------------------------|-----------------------------|----|
| <i>Nesoenas mayeri</i>            | Pink Pigeon                 | VU |
| <i>Nesofregatta fuliginosa</i>    | Polynesian Storm-petrel     | EN |
| <i>Nesospiza wilkinsi</i>         | Wilkins's Bunting           | EN |
| <i>Ninox leventisi</i>            | Camiguin Boobook            | EN |
| <i>Ninox natalis</i>              | Christmas Boobook           | VU |
| <i>Ninox rumseyi</i>              | Cebu Boobook                | EN |
| <i>Ninox spilonotus</i>           | Romblon Boobook             | EN |
| <i>Nipponia nippon</i>            | Asian Crested Ibis          | EN |
| <i>Nisaetus bartelsi</i>          | Javan Hawk-eagle            | EN |
| <i>Nisaetus floris</i>            | Flores Hawk-eagle           | CR |
| <i>Nisaetus philippensis</i>      | North Philippine Hawk-eagle | EN |
| <i>Nisaetus pinskeri</i>          | South Philippine Hawk-eagle | EN |
| <i>Ognorhynchus icterotis</i>     | Yellow-eared Parrot         | EN |
| <i>Oreomystis bairdi</i>          | Akikiki                     | CR |
| <i>Oriolus isabellae</i>          | Isabela Oriole              | CR |
| <i>Otus feae</i>                  | Annobon Scops-owl           | CR |
| <i>Otus hartlaubi</i>             | Sao Tome Scops-owl          | VU |
| <i>Otus insularis</i>             | Seychelles Scops-owl        | EN |
| <i>Otus moheliensis</i>           | Moheli Scops-owl            | EN |
| <i>Otus thilohoffmanni</i>        | Serendib Scops-owl          | EN |
| <i>Oxypogon cyanolaemus</i>       | Blue-bearded Helmetcrest    | CR |
| <i>Oxypogon stuebelii</i>         | Buffy Helmetcrest           | VU |
| <i>Paradisaea decora</i>          | Goldie's Bird-of-paradise   | VU |
| <i>Passer hemileucus</i>          | Abd Al Kuri Sparrow         | VU |
| <i>Pauxi koepckeae</i>            | Sira Curassow               | CR |
| <i>Pedionomus torquatus</i>       | Plains-wanderer             | CR |
| <i>Penelope albipennis</i>        | White-winged Guan           | EN |
| <i>Penelope perspicax</i>         | Cauca Guan                  | EN |
| <i>Penelopides mindorensis</i>    | Mindoro Hornbill            | EN |
| <i>Petroica dannefaerdi</i>       | Snares Tomtit               | VU |
| <i>Petroica multicolor</i>        | Norfolk Robin               | EN |
| <i>Petroica traversi</i>          | Black Robin                 | EN |
| <i>Pezoporus occidentalis</i>     | Night Parrot                | EN |
| <i>Phalacrocorax featherstoni</i> | Pitt Shag                   | EN |
| <i>Phapitreron cinereiceps</i>    | Tawitawi Brown-dove         | EN |
| <i>Phibalura boliviana</i>        | Palkachupa Cotinga          | EN |
| <i>Philydor novaesi</i>           | Alagoas Foliage-gleaner     | CR |
| <i>Phylloscartes ceciliae</i>     | Alagoas Tyrannulet          | CR |
| <i>Phylloscopus amoenus</i>       | Sombre Leaf-warbler         | VU |
| <i>Pica asirensis</i>             | Asir Magpie                 | EN |



|                                 |                                |    |
|---------------------------------|--------------------------------|----|
| <i>Pipile pipile</i>            | Trinidad Piping-guan           | CR |
| <i>Pithecophaga jefferyi</i>    | Philippine Eagle               | CR |
| <i>Pitta anerythra</i>          | Black-faced Pitta              | VU |
| <i>Pitta superba</i>            | Superb Pitta                   | EN |
| <i>Ploceus aureonucha</i>       | Golden-naped Weaver            | EN |
| <i>Ploceus batesi</i>           | Bates's Weaver                 | EN |
| <i>Podiceps gallardoi</i>       | Hooded Grebe                   | CR |
| <i>Podiceps taczanowskii</i>    | Junin Grebe                    | CR |
| <i>Polyplectron katsumatae</i>  | Hainan Peacock-pheasant        | EN |
| <i>Pomarea dimidiata</i>        | Rarotonga Monarch              | VU |
| <i>Pomarea mendozae</i>         | Marquesan Monarch              | EN |
| <i>Pomarea whitneyi</i>         | Fatuhiva Monarch               | CR |
| <i>Poospiza rubecula</i>        | Rufous-breasted Warbling-finch | EN |
| <i>Porphyrio hochstetteri</i>   | South Island Takahe            | EN |
| <i>Prioniturus verticalis</i>   | Sulu Racquet-tail              | CR |
| <i>Progne modesta</i>           | Galapagos Martin               | EN |
| <i>Prosobonia parvirostris</i>  | Tuamotu Sandpiper              | EN |
| <i>Pseudastur occidentalis</i>  | Grey-backed Hawk               | EN |
| <i>Pseudibis davisoni</i>       | White-shouldered Ibis          | CR |
| <i>Pseudobulweria aterrima</i>  | Mascarene Petrel               | CR |
| <i>Pseudobulweria becki</i>     | Beck's Petrel                  | CR |
| <i>Pseudonestor xanthophrys</i> | Maui Parrotbill                | CR |
| <i>Psittacula eques</i>         | Echo Parakeet                  | EN |
| <i>Psophia obscura</i>          | Black-winged Trumpeter         | CR |
| <i>Pternistis ochropectus</i>   | Djibouti Francolin             | CR |
| <i>Pterodroma cahow</i>         | Bermuda Petrel                 | EN |
| <i>Pterodroma deserta</i>       | Desertas Petrel                | VU |
| <i>Pterodroma madeira</i>       | Zino's Petrel                  | EN |
| <i>Pterodroma magentae</i>      | Magenta Petrel                 | CR |
| <i>Ptilinopus huttoni</i>       | Rapa Fruit-dove                | CR |
| <i>Ptilinopus rarotongensis</i> | Rarotonga Fruit-dove           | VU |
| <i>Puffinus auricularis</i>     | Townsend's Shearwater          | CR |
| <i>Puffinus bryani</i>          | Bryan's Shearwater             | CR |
| <i>Puffinus heinrothi</i>       | Heinroth's Shearwater          | VU |
| <i>Puffinus myrtae</i>          | Rapa Shearwater                | CR |
| <i>Pyrrhura griseipectus</i>    | Grey-breasted Parakeet         | EN |
| <i>Pyrrhura orcesi</i>          | El Oro Parakeet                | EN |
| <i>Rallus wetmorei</i>          | Plain-flanked Rail             | EN |
| <i>Rhinoptilus bitorquatus</i>  | Jerdon's Courser               | CR |
| <i>Rhipidura malaitae</i>       | Malaita Fantail                | VU |

|                                   |                                |    |
|-----------------------------------|--------------------------------|----|
| <i>Rhynochetos jubatus</i>        | Kagu                           | EN |
| <i>Rhyticeros narcondami</i>      | Narcondam Hornbill             | EN |
| <i>Rowettia goughensis</i>        | Gough Bunting                  | CR |
| <i>Rukia ruki</i>                 | Faichuk White-eye              | EN |
| <i>Sarothrura ayresi</i>          | White-winged Flufftail         | CR |
| <i>Sarothrura watersi</i>         | Slender-billed Flufftail       | EN |
| <i>Scepomycter winifredae</i>     | Winifred's Warbler             | VU |
| <i>Scytalopus canus</i>           | Paramillo Tapaculo             | EN |
| <i>Scytalopus iraiensis</i>       | Marsh Tapaculo                 | EN |
| <i>Selasphorus ardens</i>         | Glow-throated Hummingbird      | EN |
| <i>Sitta ledanti</i>              | Algerian Nuthatch              | EN |
| <i>Spizaetus isidori</i>          | Black-and-chestnut Eagle       | EN |
| <i>Spizella wortheni</i>          | Worthen's Sparrow              | EN |
| <i>Sporophila iberaensis</i>      | Ibera Seedeater                | EN |
| <i>Strigops habroptila</i>        | Kakapo                         | CR |
| <i>Symposiachrus boanensis</i>    | Black-chinned Monarch          | CR |
| <i>Synallaxis infuscata</i>       | Pinto's Spinetail              | EN |
| <i>Tanyiptera ellioti</i>         | Kofiau Paradise-kingfisher     | VU |
| <i>Taphrolesbia griseiventris</i> | Grey-bellied Comet             | EN |
| <i>Terenura sicki</i>             | Orange-bellied Antwren         | CR |
| <i>Terpsiphone corvina</i>        | Seychelles Paradise-flycatcher | CR |
| <i>Thalasseus bernsteini</i>      | Chinese Crested Tern           | CR |
| <i>Thapsinillas platenae</i>      | Sangihe Golden Bulbul          | CR |
| <i>Thaumatibis gigantea</i>       | Giant Ibis                     | CR |
| <i>Thinornis novaeseelandiae</i>  | Shore Plover                   | EN |
| <i>Thripophaga cherriei</i>       | Orinoco Softtail               | VU |
| <i>Thryophilus nicefori</i>       | Niceforo's Wren                | CR |
| <i>Todiramphus gambieri</i>       | Tuamotu Kingfisher             | CR |
| <i>Todiramphus godeffroyi</i>     | Marquesas Kingfisher           | CR |
| <i>Todiramphus ruficollaris</i>   | Mangaia Kingfisher             | VU |
| <i>Troglodytes monticola</i>      | Santa Marta Wren               | CR |
| <i>Troglodytes tanneri</i>        | Clarion Wren                   | VU |
| <i>Turdus helleri</i>             | Taita Thrush                   | CR |
| <i>Turdus xanthorhynchus</i>      | Principe Thrush                | CR |
| <i>Turnix hottentottus</i>        | Hottentot Buttonquail          | EN |
| <i>Turnix olivii</i>              | Buff-breasted Buttonquail      | EN |
| <i>Tyrannus cubensis</i>          | Giant Kingbird                 | EN |
| <i>Tyto nigrobrunnea</i>          | Taliabu Masked-owl             | VU |
| <i>Vireo gracilirostris</i>       | Noronha Vireo                  | NT |
| <i>Xenoglaux loweryi</i>          | Long-whiskered Owlet           | EN |

|                               |                           |    |
|-------------------------------|---------------------------|----|
| <i>Zapornia olivieri</i>      | Sakalava Rail             | EN |
| <i>Zentrygon carrikeri</i>    | Tuxtla Quail-dove         | EN |
| <i>Zoothera turipavae</i>     | Guadalupe Thrush          | VU |
| <i>Zosterops chloronothos</i> | Mauritius Olive White-eye | CR |
| <i>Zosterops ficedulinus</i>  | Sao Tome White-eye        | EN |
| <i>Zosterops luteirostris</i> | Splendid White-eye        | EN |
| <i>Zosterops modestus</i>     | Seychelles White-eye      | VU |
| <i>Zosterops silvanus</i>     | Taita White-eye           | EN |

## REPTILES

|                                   |                                   |    |
|-----------------------------------|-----------------------------------|----|
| <i>Abronia campbelli</i>          | Campbell's Alligator Lizard       | CR |
| <i>Alligator sinensis</i>         | Chinese Alligator                 | CR |
| <i>Batagur baska</i>              | Northern River Terrapin           | CR |
| <i>Batagur kachuga</i>            | Red-crowned Roofed Turtle         | CR |
| <i>Batagur trivittata</i>         | Burmese Roofed Turtle             | CR |
| <i>Bellatorias obiri</i>          | Arnhem Land Gorges Skink          | CR |
| <i>Borikenophis sanctaecrucis</i> | Saint Croix Racer                 | CR |
| <i>Celestus occiduus</i>          | Jamaica Giant Galliwasp           | CR |
| <i>Chelonoidis donfaustoi</i>     | Eastern Santa Cruz Giant Tortoise | CR |
| <i>Chelonoidis duncanensis</i>    | Pinzón Giant Tortoise             | VU |
| <i>Chelonoidis guntheri</i>       | Sierra Negra Giant Tortoise       | CR |
| <i>Chelonoidis hoodensis</i>      | Española Giant Tortoise           | CR |
| <i>Chelonoidis microphyes</i>     | Volcán Darwin Giant Tortoise      | EN |
| <i>Chelonoidis phantasticus</i>   | Fernandina Giant Tortoise         | CR |
| <i>Chilabothrus argenteum</i>     | Conception Bank Silver Boa        | CR |
| <i>Cnemaspis karsticola</i>       | Karst-dwelling Rock Gecko         | VU |
| <i>Cnemaspis psychedelica</i>     | Psychedelic Rock Gecko            | EN |
| <i>Conolophus marthae</i>         | Galápagos Pink Land Iguana        | CR |
| <i>Crocodylus intermedius</i>     | Orinoco Crocodile                 | CR |
| <i>Crocodylus mindorensis</i>     | Philippines Crocodile             | CR |
| <i>Crocodylus siamensis</i>       | Siamese Crocodile                 | CR |
| <i>Cuora yunnanensis</i>          | Yunnan Box Turtle                 | CR |
| <i>Cyclura collei</i>             | Jamaican Iguana                   | CR |
| <i>Cyclura lewisi</i>             | Grand Cayman Blue Iguana          | EN |
| <i>Cyrtodactylus chrysopylos</i>  | Cyrtodactylus chrysopylos         | VU |
| <i>Dierogecko inexpectatus</i>    |                                   | CR |
| <i>Gavialis gangeticus</i>        | Gharial                           | CR |
| <i>Hypsirhynchus ater</i>         | Jamaican Racer                    | CR |
| <i>Hypsirhynchus melanichnus</i>  | La Vega Racer                     | CR |
| <i>Liolaemus hellmichi</i>        | Hellmich's Tree Iguana            | VU |
| <i>Mabuya hispaniolae</i>         | Hispaniolan Two-lined Skink       | CR |
| <i>Mesoclemmys hoguei</i>         | Hoge's Side-necked Turtle         | CR |
| <i>Niveoscincus palfreymani</i>   | Pedra Branca Cool-skink           | VU |

|                                 |                                        |    |
|---------------------------------|----------------------------------------|----|
| <i>Orraya occultus</i>          | Long-necked Northern Leaf-tailed Gecko | VU |
| <i>Pholidoscelis corax</i>      | Censky's Ameiva                        | EN |
| <i>Phrynocephalus golubewii</i> | Phrynocephalus golubewii               | CR |
| <i>Psammobates geometricus</i>  | Geometric Tortoise                     | CR |
| <i>Saltuarius eximius</i>       |                                        | EN |
| <i>Spondylurus lineolatus</i>   | Hispaniolan Ten-lined Skink            | CR |
| <i>Spondylurus macleani</i>     | Carrot Rock Skink                      | CR |
| <i>Tarentola boavistensis</i>   | Boavista Wall Gecko                    | VU |
| <b>AMPHIBIANS</b>               |                                        |    |
| <i>Ameerega andina</i>          | La Planada Poison Frog                 | DD |
| <i>Andinobates viridis</i>      | Green Poison Frog                      | CR |
| <i>Arthroleptella rugosa</i>    | Rough Moss Frog                        | CR |
| <i>Arthroleptides dutoiti</i>   | Du Toit's Torrent Frog                 | CR |
| <i>Arthroleptis krokosua</i>    | Krokosua Squeaking Frog                | NT |
| <i>Atelopus angelito</i>        |                                        | CR |
| <i>Atelopus ardila</i>          |                                        | CR |
| <i>Atelopus chocoensis</i>      |                                        | CR |
| <i>Atelopus ebenoides</i>       | Huila Stubfoot Toad                    | CR |
| <i>Atelopus erythropus</i>      | Carabaya Stubfoot Toad                 | CR |
| <i>Atelopus eusebiodiazi</i>    |                                        | CR |
| <i>Atelopus exiguus</i>         |                                        | EN |
| <i>Atelopus farci</i>           | Forest Stubfoot Toad                   | CR |
| <i>Atelopus gigas</i>           |                                        | CR |
| <i>Atelopus guanujo</i>         |                                        | CR |
| <i>Atelopus halihelos</i>       | Morona-Santiago Stubfoot Toad          | CR |
| <i>Atelopus ignescens</i>       | Quito Stubfoot Toad                    | CR |
| <i>Atelopus lynchi</i>          | Jambato de Lynch                       | CR |
| <i>Atelopus mindoensis</i>      | Mindo Stubfoot Toad                    | CR |
| <i>Atelopus minutulus</i>       | Colombian Stubfoot Toad                | CR |
| <i>Atelopus monohernandezii</i> |                                        | CR |
| <i>Atelopus nicefori</i>        | Niceforo's Stubfoot Toad               | CR |
| <i>Atelopus onorei</i>          |                                        | CR |
| <i>Atelopus orcesi</i>          |                                        | CR |
| <i>Atelopus pachydermus</i>     | Schmidt's Stubfoot Toad                | CR |
| <i>Atelopus pedimarmoratus</i>  | San Isidro Stubfoot Toad               | CR |
| <i>Atelopus peruensis</i>       | Peru Stubfoot Toad                     | CR |
| <i>Atelopus petriruizi</i>      | Peters' stubfoot toad                  | CR |
| <i>Atelopus pictiventris</i>    | Painted Stubfoot Toad                  | CR |
| <i>Atelopus planispina</i>      | Flat-spined Atelopus                   | CR |
| <i>Atelopus podocarpus</i>      |                                        | CR |
| <i>Atelopus quimbaya</i>        |                                        | CR |

|                                    |                             |    |
|------------------------------------|-----------------------------|----|
| <i>Atelopus sernai</i>             |                             | CR |
| <i>Atelopus simulatus</i>          |                             | CR |
| <i>Atelopus sonsonensis</i>        |                             | CR |
| <i>Atelopus subornatus</i>         | Bogota Stubfoot Toad        | CR |
| <i>Dryophytes suweonensis</i>      | Suweon Treefrog             | EN |
| <i>Duellmanohyla uranochroa</i>    | Costa Rica Brook Frog       | EN |
| <i>Gastrotheca angustifrons</i>    | Pacific Marsupial Frog      | VU |
| <i>Gastrotheca antomia</i>         |                             | CR |
| <i>Gastrotheca dendronastes</i>    | Rio Calima Marsupial Frog   | VU |
| <i>Hyloxalus fascianigrus</i>      | Rana Saltarina de Brazalete | VU |
| <i>Leiopelma hamiltoni</i>         | Stephens Island Frog        | VU |
| <i>Leptodactylus fallax</i>        | Mountain Chicken            | CR |
| <i>Leptophryne cruentata</i>       | Bleeding Toad               | CR |
| <i>Lithobates vibicarius</i>       | Rancho Redondo Frog         | VU |
| <i>Nannophryne cophotis</i>        | Paramo Toad                 | CR |
| <i>Philautus jacobsoni</i>         | Jacobson's Bubble-nest Frog | CR |
| <i>Pristimantis albericoi</i>      | Pristimantis albericoi      | CR |
| <i>Pristimantis bernali</i>        | Argelia Robber Frog         | CR |
| <i>Pristimantis cacao</i>          | Cacao Robber Frog           | EN |
| <i>Pristimantis chrysops</i>       |                             | EN |
| <i>Pristimantis deinops</i>        |                             | EN |
| <i>Pristimantis diaphonus</i>      | Rio Calima Robber Frog      | CR |
| <i>Pristimantis diogenes</i>       |                             | VU |
| <i>Pristimantis molybrignus</i>    | Uribe Robber Frog           | CR |
| <i>Pristimantis phragmipleuron</i> | Sugar Robber Frog           | CR |
| <i>Pristimantis xylochobates</i>   |                             | CR |
| <i>Raorchestes chotta</i>          | Small Bushfrog              | DD |
| <i>Raorchestes resplendens</i>     | Resplendent Shrubfrog       | CR |
| <i>Rhaebo colomai</i>              | Carchi Andes Toad           | EN |
| <i>Rhinoderma rufum</i>            | Northern Darwin's frog      | CR |
| <i>Strabomantis necerus</i>        | Mindo Robber Frog           | VU |
| <i>Telmatobius fronteriensis</i>   |                             | DD |
| <i>Telmatobius pefauri</i>         | Arico Water Frog            | CR |
